# Supplementary material for: Effect of severe renal impairment on the pharmacokinetics of brigatinib
Source: Springer Nature journal article supplement (doi:10.1007/s10637-021-01095-5), 2021-03-20
Supplement: MOESM1 [file 18987098]

## Online Resource 1. Urine pharmacokinetic parameters for brigatinib

| <b>Parameter<sup>a</sup></b> | <b>Normal Renal<br/>Function<br/>(n=8)</b> | <b>Severe Renal<br/>Impairment<br/>(n=8)<sup>b</sup></b> |
|------------------------------|--------------------------------------------|----------------------------------------------------------|
| Ae <sub>0-168</sub> (mg)     | 16.90 (3.57)                               | 7.58 (3.77)                                              |
| Range                        | 11.58–21.77                                | 3.92–14.36                                               |
| Fe <sub>0-168</sub> (%)      | 18.78 (3.96)                               | 8.42 (4.19)                                              |
| Range                        | 12.9–24.2                                  | 4.36–16.0                                                |
| CL <sub>R</sub> (mL/min)     | 41.45 (11.55)                              | 9.17 (3.09)                                              |
| Range                        | 27.5–63.7                                  | 5.40–13.4                                                |

Ae<sub>0-168</sub>, amount of brigatinib excreted from time zero to 168 hours, CL<sub>R</sub>, renal clearance, Fe<sub>0-168</sub>, fraction of the dose (%) excreted from time zero to 168 hours.

<sup>a</sup> Data presented as mean (standard deviation)

<sup>b</sup> n=7 for Ae<sub>0-168</sub> and Fe<sub>0-168</sub>, as one participant did not have urine collected after 72 hours postdose
